# 1 **New criteria for sympatric speciation in the** 2 **genomic era**

3

4

5 Emilie J Richards<sup>1</sup>, Maria R. Servedio<sup>1</sup>, Christopher H Martin<sup>1\*</sup>

6

7

8

9

10

11

12

13

14

15

16

17

18

19

20 <sup>1</sup> Department of Biology, University of North Carolina at Chapel Hill, Chapel Hill NC

21 \*corresponding author: [chmartin@unc.edu](mailto:chmartin@unc.edu)

22 Key words: sympatric speciation, genomics, gene flow, introgression, selection, cichlid

23 Main text: 3,139 words, 1 Figure, 3 Boxes

24 **Abstract**

25 Sympatric speciation illustrates how natural and sexual selection may create new species in  
26 isolation without geographic barriers. However, so far, all genomic reanalyses of classic  
27 examples of sympatric speciation indicate secondary gene flow occurred. Thus, there is a need to  
28 revisit criteria for demonstrating sympatric speciation in the face of widespread gene flow. We  
29 summarize theoretical differences between sympatric speciation and speciation-with-gene-flow  
30 models and propose genomic criteria for sympatric speciation: 1) timing of fine-scale  
31 introgression; 2) timing of selective sweeps and 3) functional annotation of this introgressed  
32 variation; and 4) the absence of similar sweeps in outgroups. Monophyly is an insufficient  
33 criterion for sympatric speciation; we must take a locus-specific approach to investigate whether  
34 any introgression contributed to reproductive isolation.

35

36

37

38

39

40

41

42

43

44

45

46

47

## 48 **What is sympatric speciation?**

49 Sympatric speciation is the evolution of reproductive isolation within a single panmictic  
50 population without the aid of any geographic isolation [1]. It represents the most extreme and  
51 controversial endpoint on the divergence with gene flow continuum: panmictic gene flow and no  
52 initial divergence at the start of speciation [2–5]. In the context of theoretical speciation models,  
53 sympatric speciation is the most difficult process because the starting conditions involve no pre-  
54 existing divergence, potentially tied with physical linkage, among loci involved in reproductive  
55 isolation (i.e. ‘barrier’ loci [6,7]); instead, **linkage disequilibrium** (see Glossary) must build up  
56 through time within a population through the action of disruptive natural selection and strong  
57 assortative mating by ecotype, despite the countervailing eroding force of recombination [8–11].

58 We can thus distinguish different types of scenarios that will result in two sister species  
59 being found in sympatry based on whether **secondary gene flow** aided population divergence: 1)  
60 classic sympatric speciation without gene flow; 2) sympatric speciation in the presence of a)  
61 neutral secondary gene flow or b) after differential sorting of an ancestral hybrid swarm. In the  
62 latter case, it is important to distinguish whether the ancestral hybrid swarm population achieved  
63 panmixia before later divergence (i.e. sympatric divergence); otherwise, differential sorting of  
64 haplotypes within the hybrid swarm is better described by secondary contact speciation with  
65 gene flow models. 3) Speciation may be aided by secondary gene flow that a) triggers initial  
66 sympatric divergence or b) increases divergence after initial divergence in sympatry becomes  
67 stalled, an outcome of many sympatric speciation models without sufficiently strong disruptive  
68 selection [12–15]. Finally, 4) secondary contact after a period of allopatry between two  
69 populations can result in coexistence or reinforcement, if there is not collapse into a single

70 admixed population [16–19]. We consider scenarios 1 and 2 to be examples of sympatric  
71 speciation, whereas scenarios 3 and 4 would be examples of speciation aided by secondary gene  
72 flow. Interestingly, hybrid swarm scenarios exist in a gray area, since substantial initial gene  
73 flow from multiple sources may increase ecological or preference variation within a population  
74 that is sufficient to trigger later sympatric divergence, even without segregating inversions or  
75 genetic incompatibilities [20–22]. So far, we know of no examples of scenario 1 within any case  
76 study of sympatric sister species examined using genomic tools; even long diverged species  
77 show some evidence of **introgression** in their past (e.g. [23]). In contrast, sympatric speciation  
78 with neutral gene flow (Scenario 2) and speciation aided by gene flow (Scenarios 3 and 4)  
79 frequently appear to operate concurrently even within a single sympatric adaptive radiation (e.g.  
80 [24–26]).

81       It is important to distinguish these scenarios because theoretical models predict that  
82 sympatric divergence unaided by any form of secondary gene flow is substantially more difficult  
83 than other speciation with gene flow scenarios (Box 1). Gene flow throughout the speciation  
84 process allows recombination to break down linkage disequilibrium among alleles associated  
85 with ecological divergence and assortative mating. There are actually three different classes of  
86 sympatric speciation models to consider: the most difficult process involves independently  
87 segregating loci for ecotype, female preferences, and male traits within the population, whereas  
88 sympatric divergence is much easier if any of these three types of traits are combined, such as  
89 assortative mating based on phenotype matching instead of separate loci for preference and traits  
90 [27,28] or “magic” traits (such as assortative mating based on microhabitat preference;  
91 [9,10,29]). Sympatric speciation by sexual selection alone is also theoretically possible if there is

92 substantial preference variation either initially within the population or through secondary gene  
93 flow [20,30,31].

94 Any form of linkage disequilibrium among ecological and mate choice loci formed in  
95 allopatry, whether due to physical linkage, selection, or drift, can tend to shift the initial starting  
96 conditions of panmixia in favor of sympatric divergence [17]. However, linkage disequilibrium  
97 without physical linkage subsides within a few generations after secondary sympatry and thus  
98 may not allow sufficient time for the evolution of assortative mating within the population. In  
99 contrast, pre-existing physical linkage among ecological loci has been shown to increase the  
100 probability of divergence, especially when it captures already divergent alleles as is more likely  
101 after allopatric divergence [32,33]. Similarly, physical linkage can cause preference and trait  
102 alleles to mimic phenotype matching, although even tight linkage can break down over long  
103 timescales (shown in a model with population structure: [34]). Segregating inversions in the  
104 ancestral population are now well-known empirical examples of physical linkage promoting  
105 divergence in sympatry [35–37]. Sympatric divergence is also limited by many other restrictive  
106 conditions regarding the costs of female choosiness and strengths of disruptive selection and  
107 assortative mating (Box 1).

108 Despite extensive searches for examples of sympatric speciation in the wild, there are few  
109 convincing case studies due to the difficulty of ruling out historical allopatric scenarios (see  
110 below) and the new difficulty of ruling out a role of introgression in speciation. Furthermore, the  
111 role of magic traits or matching vs. preference/trait mechanisms is not fully understood in any  
112 existing case study. Thus, we still have very limited empirical tests of an extensive theoretical

113 literature and diverse competing models of the notoriously difficult process of sympatric  
114 speciation [24,27,28,38–42].

115

### 116 **The classic problem of sympatric speciation**

117 There are four traditional criteria for demonstrating classic sympatric speciation (Scenario 1): 1)  
118 sister species which are reproductively isolated, 2) form a **monophyletic** group, 3) largely  
119 overlap in ranges, and 4) have biogeographic and evolutionary histories that make periods of  
120 allopatric divergence highly unlikely [1]. Very few case studies have been able to meet these  
121 rigorous criteria despite intense searches [1,5]. This has led to the prominent status of crater lake  
122 cichlid radiations as some of the best examples of sympatric speciation in the wild due to the  
123 uniform shape of isolated volcanic lakes which convincingly rule out phases of allopatry due to  
124 water level changes (Box 2; [43–45]).

125       The monophyly criterion assumes that monophyly arises only when a single ancestral  
126 population underlies the present-day daughter species. This is typically met by inferring a single  
127 phylogeny from one or more loci. This single point-estimate view of evolutionary history is  
128 problematic because it obscures the presence of non-bifurcating relationships among organisms  
129 (e.g. sister species which derived ancestry from multiple source populations due to extensive  
130 gene flow or hybrid speciation) and the real variation in evolutionary histories among genes  
131 across the genome itself (e.g. [46]). Few regions of the genome may initially contribute to  
132 reproductive isolation resulting in a heterogeneous genomic landscape of differentiation among  
133 incipient species [47], a pattern now extensively supported across case studies [48–51].  
134 Therefore, monophyletic relationships are consistent with, but not exclusive to a scenario of

135 sympatric speciation. Examining heterogeneous evolutionary histories across regions relevant to  
136 speciation is thus crucial for understanding the processes and conditions under which sympatric  
137 divergence can occur.

138

### 139 **The ‘new’ problem of sympatric speciation**

140 While genomics has increased our ability to resolve evolutionary relationships among organisms,  
141 it has also revealed more complex evolutionary histories of multiple colonization and extensive  
142 secondary gene flow in all examples of sympatric speciation that have been examined with  
143 genomic data so far [52–68]. Indeed, only a handful of genes may directly contribute to the  
144 speciation process whereas the rest of the genome is porous to gene flow while reproductive  
145 isolation is incomplete [47,69]. Examples of ‘classic’ sympatric speciation without secondary  
146 gene flow (Scenario 1) are now unknown after applying modern genomic tools to search for  
147 introgression (and paleogenomics is therefore unnecessary to provide historical point estimates  
148 of spatial isolation as recently suggested [70]). Instead, it is still possible that sympatric  
149 speciation occurs in the face of secondary gene flow in nearly all these examples (Scenario 2;  
150 [67]). Importantly, most evidence of secondary gene flow comes from genome-wide tests of  
151 introgression from outgroup lineages, not gene flow between diverging populations in sympatry  
152 (e.g. [64,65]). Therefore, introgression detected at the genome-wide level from lineages outside  
153 the speciation event tells us little about the divergence process among incipient sympatric species  
154 and how gene flow shaped the process of speciation.

155         The challenge of sympatric speciation in the genomic era is establishing or rejecting a  
156 functional role for the ubiquitous secondary gene flow present during the speciation process, in

157 effect ruling out scenarios 3 and 4 in favor of scenario 2 (Fig. 1). Even if signatures of secondary  
158 gene flow are detected, speciation could still have occurred solely via mechanisms of sympatric  
159 speciation if that secondary gene flow did not play a causal role in divergence. Secondary gene  
160 flow could play a causal role if it introduced novel genetic variation or physically linked alleles  
161 (e.g. a segregating inversion) that promote speciation before the start of divergence, such as  
162 **hybrid swarm** (Scenario 2b; ([21,22,25,71]), adaptive introgression (Scenario 3; [72–77]),  
163 **transgressive segregation** (Scenarios 2-3; [78,79]), or hybrid speciation (Scenario 4; [80]). We  
164 note a distinction between ancestral introgression of segregating haplotypes promoting speciation  
165 (speciation with gene flow models apply) versus sufficient time for recombination to break down  
166 these haplotypes after a hybrid swarm and create panmictic conditions before the start of  
167 divergence (sympatric speciation models apply) versus simply inflated ecological and preference  
168 variation within a population due to hybrid swarm (gray area; sympatric speciation more likely  
169 due to this initial gene flow). Here we propose and discuss new genomic criteria to help establish  
170 or reject a functional role of secondary gene flow in the speciation process (Fig. 1). This is  
171 necessary to identify putative cases of the sympatric speciation process when gene flow appears  
172 to be nearly universal in the wild, particularly among sympatric diverging populations.

173

#### 174 **New criteria for sympatric speciation in the genomic era**

175 Although genome-wide analyses of introgression provide a starting point, ultimately  
176 consideration of the time of arrival and functional role of each introgressed region within extant  
177 sympatric sister species pairs will be necessary to distinguish between sympatric speciation with  
178 gene flow (Scenario 2) or speciation aided by secondary gene flow (Scenario 3; e.g. segregating



179 inversions [35,81] or ancient balancing selection on regions containing multiple barrier loci  
180 [82,83]). We suggest four major types of genomic analyses as new criteria to help identify  
181 sympatric speciation with gene flow: 1) estimate the timing of introgression into sympatric sister  
182 species relative to their divergence time, 2) infer the presence and timing of selective sweeps  
183 within sympatric sister species, 3) annotate candidate adaptive introgression regions for  
184 functional elements or trait associations that may be relevant to speciation, and 4) if closely  
185 related non-speciating outgroups are available, confirm the lack of selective sweeps of these  
186 regions in outgroups. Combining these statistics will aid in distinguishing where case studies fall  
187 along the speciation with gene flow continuum and whether the starting conditions of panmixia  
188 in sympatric speciation models will apply (Fig. 1).

189

190 *1) Secondary gene flow is constant across the speciation process or not concurrent with*  
191 *divergence times*

192 Estimating the duration of gene flow and the timing of introgression relative to the timing of  
193 divergence between sympatric sister species will help distinguish between scenarios of sympatric  
194 speciation, speciation with gene flow, and secondary contact. If populations diverged in  
195 sympatry independent of any concurrent secondary gene flow (Scenario 2), we might expect to  
196 see weak concordance of the timing of gene flow with divergence times among species. This  
197 discordance could be in the form of discrete gene flow events that date well before or after  
198 divergence times among species (Fig 1A). In the case of continuous gene flow from the time of  
199 colonization to the present, more information about the functional role and selection on  
200 introgressed regions will be needed.

201           The timing of introgression is also useful in ruling out other evolutionary phenomena that  
202 can leave similar genomic signatures. The random or biased assortment of ancestral variation  
203 among lineages during the speciation process can create similar phylogenetic patterns to  
204 introgression resulting from secondary gene flow [82,84]. Timing is important for differentiating  
205 introgression from the sorting of ancient ancestral polymorphisms due to processes such as  
206 balancing selection. For example, if genetic divergence in an introgressed region shared between  
207 sister species is greater (e.g. elevated  $D_{xy}$ ) than expected given divergence time between the  
208 sister species, this pattern suggests differential sorting of ancestral variation and doesn't rule out  
209 a scenario of sympatric speciation (Scenarios 1 & 2). If introgression after secondary contact did  
210 occur, genetic divergence in these regions between recipient sister species should be lower than  
211 expected given their divergence time. Increasingly sophisticated approaches for detecting fine-  
212 scale patterns of introgression are available to estimate the timing and duration of gene flow  
213 from genomic data (Box 3).

214

215 *2) Lack of selective sweeps or non-concurrent timing of sweeps in regions that have experience*  
216 *gene flow*

217 We can use information about selective sweeps of introgressed variation to further characterize  
218 the role of gene flow in sympatric divergence. When an allele is selectively favored in a  
219 population, positive selection may cause it to increase in frequency and form a localized  
220 selective sweep of reduced genetic variation surrounding the adaptive variant [85]. Such regions  
221 of high differentiation in recently diverged species are often targeted as candidates for speciation  
222 genes, although other processes not directly associated with speciation can lead to similar

223 patterns of high heterogeneity in differentiation across a genome (reviewed in [86–88]); indeed,  
224 there is still no evidence that these regions are associated with reproductive isolation or reduced  
225 gene flow and can also result from adaptive introgression [89,90]). If speciation was recent or  
226 ongoing, there may be strong signatures of a selective sweep for particular haplotypes in at least  
227 one of the sister species for regions involved in the divergence process (Fig. 1B). If secondary  
228 gene flow was neutral with respect to speciation, we may find no signatures of selective sweeps  
229 in those introgressed regions.

230       Importantly, a sweep of the same introgressed region in both sympatric sister species may  
231 be interpreted as adaptation to the same new environment, which may not contribute to  
232 reproductive isolation between the pair (dependent on their respective genetic backgrounds; e.g.  
233 [90,91]). However, this pattern is also consistent with the sweep of a region contributing to a  
234 ‘one-allele’ mechanism of mate choice [27,28,92], such as increased female choosiness in both  
235 sympatric sister species (e.g. [93]), which *would* contribute to reproductive isolation. Thus,  
236 selective sweeps of an introgressed region in both sympatric sister species do not rule out its role  
237 in aiding the speciation process.

238       Alternatively, if selective sweeps are detected, the timing of selective sweeps in the  
239 regions affected by this gene flow can give indirect evidence about the selective pressure  
240 underlying the sweep. It is challenging to infer something about the importance of an  
241 introgressed region if the timing of introgression predates the timing of the selective sweep  
242 because linkage disequilibrium among loci relevant to speciation may take time to build up, a  
243 process involved in most speciation models [9,10]. However, the absence of selective sweeps or  
244 introgression until long after population divergence would suggest that introgression was not

245 relevant to the speciation process (Scenario 2a). Introgressed regions that have undergone soft  
246 selective sweeps and were important for divergence may easily be missed, but increasingly  
247 sensitive methods [94,95] are making it easier to detect them.

248

249 *3) Weak support for casual role of secondary gene flow based on functional genetic analyses of*  
250 *variants in the region*

251 Another potential source of evidence for the functional importance of gene flow can come from  
252 associations between variants in introgressed regions with traits involved in ecological and  
253 sexual isolation between sister species from genome-wide association studies (GWAS).

254 However, many complex traits are driven by a large number of variants of small effect and ruling  
255 out a functional role for gene flow from any annotations is difficult (e.g. omnigenic model; [96]).

256 The conservation of sequences within introgressed regions across taxa may also provide strong  
257 evidence of a functional role (e.g. PhastCons [97]). Finally, and most powerfully, genome editing  
258 and gene expression reporter systems are increasingly tractable in non-model systems (e.g. [98–  
259 101]). This is ultimately an asymmetric problem: finding evidence that an introgressed region  
260 may have contributed to reproductive isolation is far easier than demonstrating that no

261 introgressed regions contributed to reproductive isolation in any way [67]. Finding evidence for  
262 sympatric speciation in the wild is now the difficult problem of functional genetic analyses of  
263 introgressed regions.

264

265 *4) Similar patterns of selection or divergence in the introgressed regions in closely related*  
266 *outgroup populations*

267 Thorough investigations of these same regions in outgroups to the sympatric species gives added  
268 power to distinguish whether secondary gene flow aided sympatric divergence. If non-  
269 diversifying, closely related species exist in similar environments and haven't diversified in a  
270 similar manner but share signatures of selective sweeps in the same regions, then the observed  
271 introgression may have been neutral relative to speciation, e.g. due to adaptations to shared  
272 changes in climate or pathogens or shared regions of reduced recombination or increased  
273 background selection. For example, several studies comparing genomic landscapes of  
274 differentiation across closely related taxa have found that high differentiation observed in the  
275 same genomic regions across taxa reflects the action of linked selection across low-  
276 recombination regions rather than selection against gene flow at barrier loci [102–110].

277

## 278 **Concluding Remarks**

279 Sympatric speciation remains among the most controversial evolutionary processes, beloved by  
280 theorists and long sought after by empiricists. While evidence for this process appeared to be  
281 mounting using traditional criteria [5], genomic data has now cast doubt on all these putative  
282 examples due to the ubiquity of secondary gene flow. Furthermore, nearly all our existing case  
283 studies involve some form of automatic magic trait, such as assortative mating by habitat  
284 [35,111,112], along a depth gradient [63], or environment-induced phenology shifts [113]. We  
285 think an outstanding remaining question is whether sympatric divergence can occur in nature  
286 without the aid of some form of magic trait, as originally demonstrated to be possible in theory  
287 [9,114].

288 Future fine-scale investigations of introgression will likely continue to paint a complex  
289 picture of the role of secondary gene flow in nearly all speciation events. The highly polygenic

290 and multi-dimensional nature of adaptation and mate choice suggests that an ‘all-of-the-above’  
291 speciation scenario containing a mix of preference/trait, magic trait, and phenotype matching,  
292 each spread across a wide distribution of allelic effect sizes with varying times of arrival, will be  
293 the norm in nature. In contrast, although numerous and diverse, most speciation models continue  
294 to address these mechanisms in a piecemeal fashion with an assumption of large effect alleles. It  
295 remains unclear how different mechanisms, effect sizes, and times of arrival will interact and  
296 compete within a single model.

297         Interestingly, strict isolation of sympatric environments such as crater lakes may  
298 ultimately become less important, since even these isolated environments are not isolated from  
299 secondary gene flow [115,116]. Instead, recent sympatric divergence combined with well  
300 characterized introgression and functional annotations may be the new limiting factor for  
301 convincing case studies of sympatric divergence in the genomic era.

302

303

304

305

306

307

308

309

310

311

312

313 ***Box 1. Why do we care whether speciation is sympatric?***

314 An increasingly common claim in the empirical speciation literature is that there is no difference  
315 between ‘speciation with gene flow’ and ‘sympatric speciation’ (e.g. [70]). This contrasts sharply  
316 with the rich theoretical literature differentiating models of sympatric speciation with models of  
317 speciation with gene flow. Indeed, theory teaches us that we should care about the real  
318 differences between the process of sympatric speciation (i.e. population divergence in sympatry  
319 without the aid of introgression contributing to reproductive isolation) and other models of  
320 speciation with gene flow. Sympatric speciation is uniquely and notoriously difficult [117], in  
321 part because quite specific conditions of resource availability (e.g., [9,118]), mating traits and  
322 preferences (e.g., [31,119]), and search costs (e.g., [120]) must be met for it to occur.

323 Inferences from theoretical models predict that, under a scenario of speciation with gene  
324 flow (Scenario 3), introgression can make the process of speciation much easier in three ways.  
325 First, by introducing additional variation in ecological traits into the population, introgression  
326 could potentially facilitate a branching process due to competition for resources (although we are  
327 not aware of a model that assesses this precise situation, it can be inferred from the dynamics of  
328 [9]). Second, introgression of novel alleles for mating preferences may provide a boost in  
329 preference variation that could be an important trigger to aid the evolution of assortative mating  
330 under a preference/trait mechanism, which requires preference variation to be large ([20,31]).  
331 Indeed, we see exactly this pattern of secondary gene flow of olfactory alleles shortly before the  
332 rapid divergence of a Cameroon cichlid radiation in Lake Ejagham [66]. Third, secondary  
333 sympatry may lead to increased linkage disequilibrium between assortative mating and  
334 ecological loci or among ecological loci. It seems logical that this might facilitate sympatric

335 speciation as this metric is often described as progress along the speciation continuum. However,  
336 initial linkage disequilibrium has been shown not to matter much in at least some scenarios [8],  
337 because without physical linkage, linkage disequilibrium will break down quickly. However,  
338 physical linkage may enable these alleles to remain in association for a sufficient time for  
339 assortative mating to evolve within the population (e.g., [34]). Initial linkage disequilibrium may  
340 also increase the probability of allelic capture by an inversion or for selection for new mutations  
341 within the inversion that may affect both ecology and assortment [32]. Increased linkage  
342 disequilibrium among ecological loci may also increase the probability of sympatric divergence,  
343 but this is in effect similar to varying effect sizes of alleles at ecological loci (e.g. many small  
344 effect alleles within a region resemble a large-effect locus [121–124]).

345         The fundamental difference between sympatric speciation and speciation with gene flow,  
346 including secondary contact scenarios, lies in the fact that very often multiple equilibrium states  
347 exist in speciation models, such that loss of divergence and maintenance of divergence in the  
348 presence of gene flow are both possible outcomes, depending on the starting conditions of a  
349 population (this is nicely illustrated for one measure of divergence by [17], Fig. I). In such  
350 cases, speciation is much more easily reached from starting conditions that match those of two  
351 populations that have diverged largely in allopatry due to the large amount of allelic variation or  
352 pre-existing phenotypic bimodality and assortative mating. Even for scenarios of speciation with  
353 gene flow that are much easier, such as geographic separation between two incipient species that  
354 are undergoing gene flow, differentiation is much more difficult to reach or maintain from an  
355 initially homogeneous population than from an initially differentiated one [125,126].



356 **Fig. I**

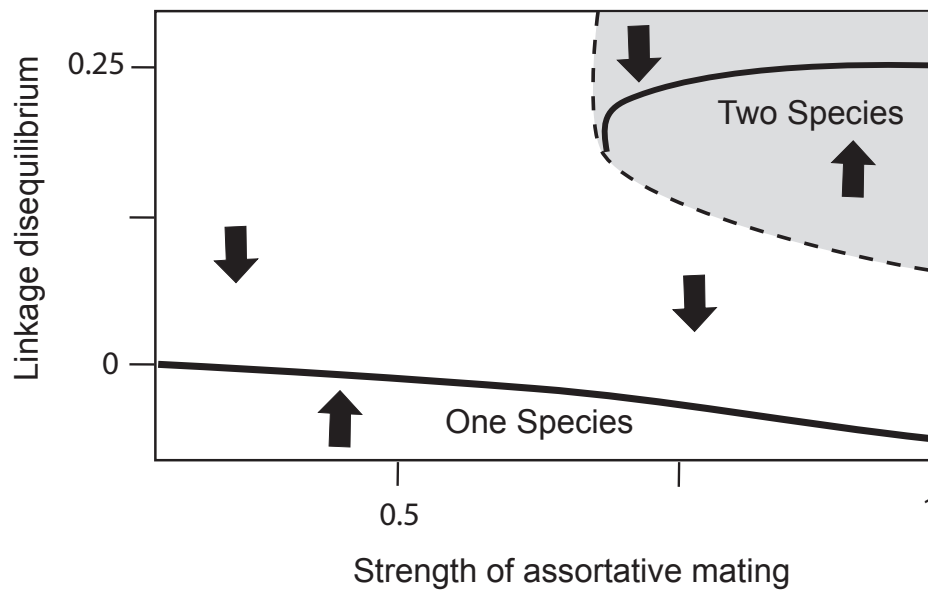

357

358

359 **Fig. I.** *Two equilibrium cases exist for the linkage disequilibrium (LD), a proxy for*  
360 *differentiation into two distinct “species” in this model, that can be maintained between two loci*  
361 *that are under disruptive selection and determine assortative mating. With little initial LD, the*  
362 *one-species equilibrium is likely to be reached even when the intensity of assortment is high.*  
363 *When LD in the traits is initially large, as can be the case if there is initially divergence in*  
364 *allopatry, the two-species equilibrium can be reached instead. Modified from [17].*

365

366

367

368

369

370 **Box 2. Evidence for sympatric speciation from crater lake cichlid radiations**

371 There are relatively few volcanic chains of crater lakes containing fishes in the tropics, notably  
372 found only in Cameroon, Nicaragua, Tanzania, Uganda, Madagascar, and Papua New Guinea  
373 [63,127,128]. Although sympatric radiations of endemic fishes are known from other isolated  
374 saline, alkali, and ancient lakes [129–132], only three lineages of cichlids have radiated in the  
375 world’s crater lakes (Fig. II). The most diverse is Barombi Mbo, Cameroon with eleven endemic  
376 species, followed by Lake Bermin, Cameroon with nine [43]. Nicaraguan crater lakes reach up to  
377 five species [45,55,133,134], the East African craters never exceed two sympatric species  
378 [63,68], and Madagascar’s several crater lakes each contain only a single endemic cichlid [128].  
379 It remains unknown why regional and lineage diversity varies so greatly because there appears to  
380 be no relationship with crater lake size or age (up to approximately 5 km diameter and 2 million  
381 years old) until reaching the much larger sizes of the East African rift lakes ([135], but also see  
382 [134]).

383 In contrast to claims in a recent review [70], the evidence for sympatric speciation with  
384 secondary gene flow is rather consistently in favor and remarkably similar across all crater lake  
385 cichlid radiations. In all cases examined with genomic data so far, secondary gene flow was  
386 detected, but there was little evidence it came from substantial divergence in allopatry followed  
387 by secondary contact. Instead, nearly all studies have concluded sympatric divergence with  
388 periodic or continuous gene flow, frequently from an initial hybrid swarm population (i.e.  
389 introgression from multiple outgroup populations; [54,63–65,68]).

390 We think that the best evidence for secondary gene flow as a trigger of sympatric  
391 divergence in cichlids comes from a radiation of three *Coptodon* species in Lake Ejagham:

392 demographic analyses of whole genomes suggest that this population did not diversify for 8,000  
393 years in the face of frequent gene flow until an influx of olfactory receptor alleles coinciding  
394 with the first sympatric divergence event in the lake [66]. Similarly in Lake Victoria, segregating  
395 opsin alleles in riverine cichlid populations were differentially sorted among Lake Victorian  
396 cichlids and may have triggered their diversification [25].

397 Evidence for sympatric divergence in crater lake cichlids without the aid of secondary  
398 gene flow remains elusive. Malinsky et al. [63] showed that introgression and hybrid swarm  
399 predated the divergence of a shallow/deep-water pair of cichlids in Lake Massoko, Tanzania;  
400 however, these ancestral segregating haplotypes may have later aided sympatric divergence  
401 (which admittedly is very difficult to rule out – see text). Very recent sympatric divergence in  
402 some crater lakes on the order of thousands of years may also suggest that ongoing divergence  
403 occurred in sympatry without the aid of gene flow [133,136]; however, it remains unclear if this  
404 incipient divergence will become stalled as in other sympatric radiations [24]. Very rare  
405 secondary gene flow without a clear functional role into the Barombi Mbo cichlid radiation (<  
406 1% introgressed regions in nearly all species) provides weak evidence of sympatric divergence,  
407 but more functional characterization and timing of introgression is needed [67]. The recent  
408 advent of transgenic reporters, CRISPR-Cas9, and *in situ* hybridization genetic tools within  
409 Nicaraguan crater lake cichlids provides much promise for future investigations of the role of  
410 introgression in sympatric divergence [99,137].

411

412

413

414 **Fig. II**

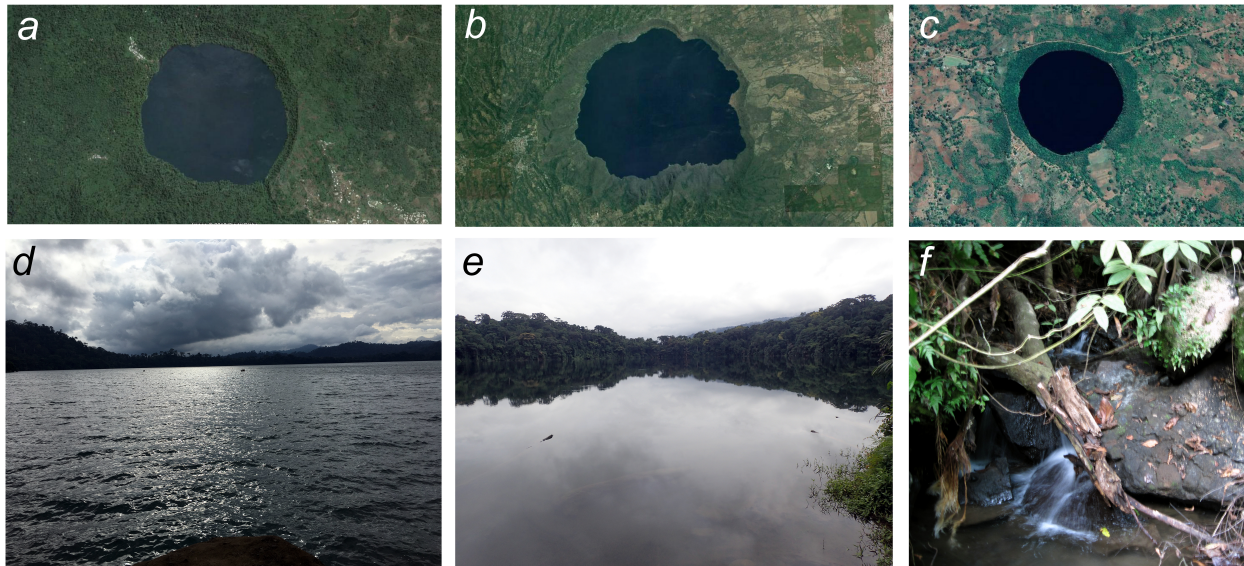

415

416 **Fig. II** Examples of volcanic crater lakes containing endemic cichlid radiations around the globe:

417 *a,d,f)* Barombi Mbo, Cameroon and its only outlet stream; *b)* Lake Apoyo, Nicaragua, *c)* Lake

418 Massoko, Tanzania, *e)* Lake Bermin, Cameroon. Satellite images (a-c) from Google Earth; other

419 images by CHM.

420

421

422

423

424

425

426

427

428

429 **Box 3. Tools for detecting and dating local gene flow and selective sweeps**

430 *1) Detecting and dating local secondary gene flow*

431 While there are a variety of tests to detect gene flow on a local scale or within sliding genomic  
432 windows [23,138–142], dating gene flow events is still accomplished mostly at the level of the  
433 entire genome (although see [141] for dating introgression relative to divergence). Currently,  
434 three types of demographic **coalescent** modeling approaches can infer local gene flow timing  
435 based on different information from genomic data: 1) the distribution of allele frequencies from  
436 genotype data (site frequency spectrum: [143,144]), 2) the distribution of haplotype block  
437 lengths from phased genomes [145–148], and 3) variation in coalescent patterns among gene  
438 trees [149]. Alternative approaches using **conditional random fields** [150] and **hidden Markov**  
439 **models** [151,152] have also been used to detect and date gene flow events.

440

441 *2) Dating selective sweeps and ages of beneficial alleles:*

442 Methods for estimating the age of a sweep of a beneficial allele exploit several different aspects  
443 about the pattern of variation surrounding the allele on its haplotypic background. These include  
444 heuristic approaches that use point estimates of mean haplotype length or the number of derived  
445 mutations within a chosen distance of the site [153–156] and model-based approaches that use  
446 demographic information and summary statistics of allele frequencies and linkage disequilibrium  
447 to model a distribution of ages that fit the observed data [157–160]. Alternatively, full sequence  
448 data about haplotype structure on chromosomes and models that leverage the length of ancestral  
449 haplotypes surrounding the beneficial allele and the accumulation of derived mutations can be  
450 used to estimate the age of beneficial alleles [161–163].

451

452 3) *Functional genetic analyses of introgressed variants*

453 Functional assessments of introgressed regions minimally involve searching an annotated  
454 reference genome for genes with relevant functions known for model organisms (or a pipeline  
455 for assembling and annotating the organism of interest if an annotated reference is not already  
456 available (reviewed in [164,165]). Introgressed regions that are unannotated can be searched for  
457 evidence of potential functional importance based on strong sequence conservation across taxa  
458 [97] or potential regulatory elements (reviewed in [166]). Additionally, genome wide association  
459 studies (GWAS) can highlight variants in introgressed regions that may underlie complex traits  
460 of interest, including novel variants previously unknown in model organisms (GWAS reviewed  
461 in [167–169]). Functional validation of gene and regulatory element variants through genome-  
462 editing experiments is also becoming increasingly tractable for non-model organisms (e.g.  
463 [98,99,101,170]).

464

465

466

467

468

469

470

471

472

473 **Fig. 1**

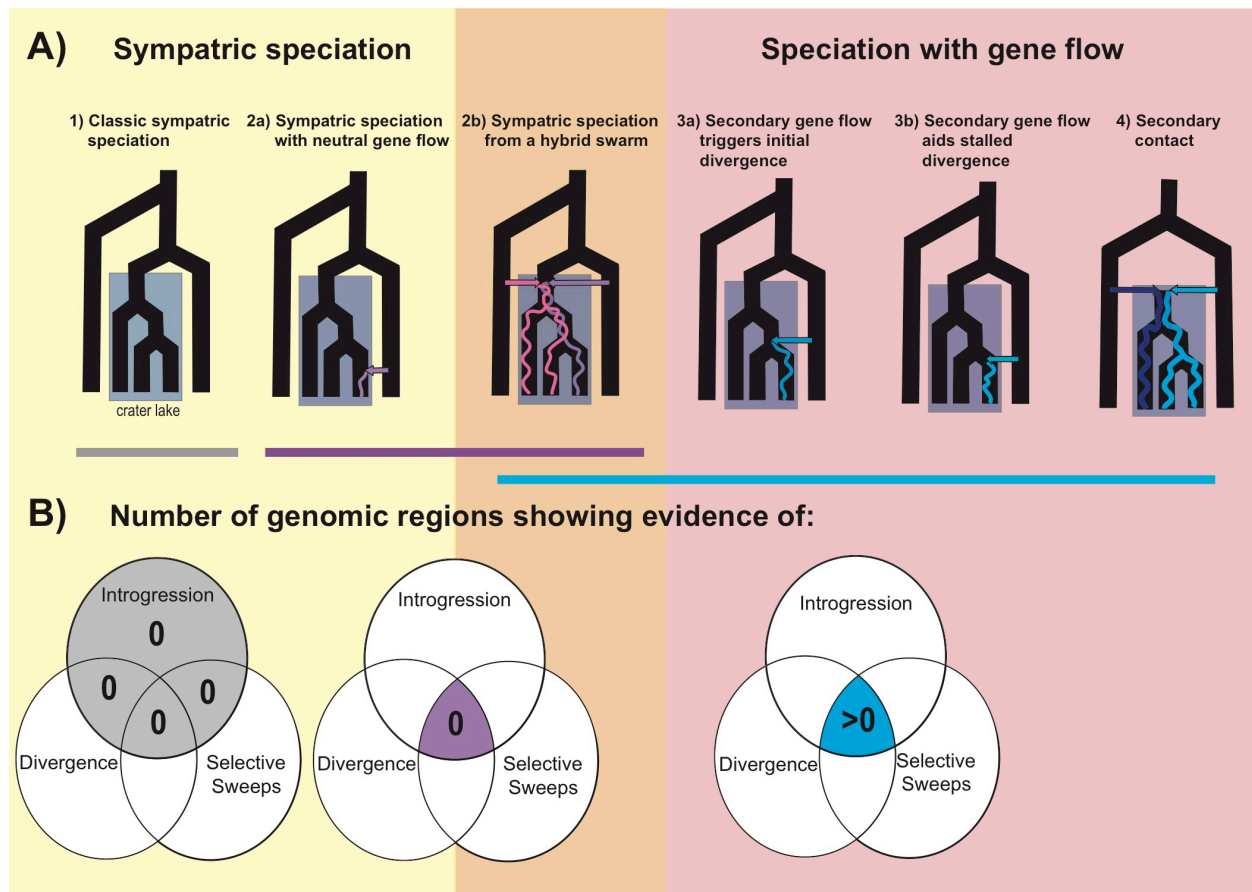

474

475 **Figure 1: Genomic signatures of sympatric speciation and speciation with gene flow.**

476 Speciation scenarios are grouped into sympatric speciation scenarios (yellow box) and speciation

477 with gene flow scenarios (red box). Speciation from a hybrid swarm (orange box) can fall under

478 either category and additional information is necessary to determine what category of speciation

479 models best describe this process. **A)** The timing of gene flow relative to divergence can be used

480 to distinguish between speciation scenarios. The colored arrows represent gene flow events and

481 the colored lines within the tree represent a signature of introgression from that gene flow event

482 into the sympatric species. **B)** Venn diagrams illustrating the number of genomic windows across

483 the entire genome expected to have overlapping signatures of introgression (e.g.  $f_d$  outliers),

484 genetic divergence (e.g.  $F_{st}$  and  $D_{xy}$  outliers), and selective sweeps (e.g. SweeD) for each

485 speciation scenario (e.g. see [77]). The highlighted sections of the Venn diagrams indicate the  
486 key signature that can be used to distinguish between the scenarios. The scenarios that are  
487 expected to leave very similar signatures of overlap are grouped by the bars colored with their  
488 respective Venn diagram.

489

490

491

## 492 **Glossary Box**

493

494 **Coalescence:** The event of two sampled lineages from different populations merging back in  
495 time in a shared ancestral lineage.

496

497  **$D_{xy}$ :** A measure of absolute genetic divergence between populations calculated as the average  
498 number of pairwise differences between sequences from two populations, excluding all the  
499 comparisons between sequences within populations.

500

501 **Hybrid swarm:** A genetically diverse population with unique allele combinations derived from  
502 the hybridization of multiple distinct taxa and subsequent backcrossing with hybrids and crossing  
503 between hybrids themselves.

504

505 **Hidden Markov model:** A statistical modeling approach used to infer hidden states from  
506 observed data along a sequence, where each hidden variable is independent of all others and  
507 conditional only on the state of the previous hidden variable.

508



509 **Conditional random field:** A statistical modeling approach similar to hidden Markov models  
510 except that each hidden variable can be conditional on regional hidden variables, not just the  
511 immediately previous one.

512

513 **Incomplete lineage sorting:** The imperfect sorting of ancestral alleles between diverging  
514 lineages that creates variable signatures about the evolutionary relationships among organisms.

515

516 **Introgression:** The movement and incorporation of genetic material from one distinct lineage  
517 into another upon hybridization between the two and subsequent backcrossing with one of the  
518 parent species.

519

520 **Linkage disequilibrium:** A non-random association of alleles at two or more loci.

521

522 **Monophyletic:** A group of lineages where the most recent ancestor of the group is not an  
523 ancestor of any lineages outside the group.

524

525 **Secondary gene flow:** Any gene flow event from non-sympatric populations after the initial  
526 colonization of the area that sympatric sister species diverged in. Introgression into the diverging  
527 sister species following such events potentially brings in variation that has evolved in allopatry  
528 that can aid the speciation process.

529

530 **Transgressive segregation:** The formation of extreme phenotypes in a segregating hybrid  
531 population that are outside the range of phenotypes observed in parental species.

## 532 Acknowledgements

533 We thank J. McGirr, M. St. John, J. Poelstra, B. Reinhard, and J. Hermisson for valuable  
534 discussion of content in this manuscript. This work was supported by the National Science  
535 Foundation DEB CAREER Grant #1749764 and by the University of North Carolina to CHM.

536

537

## 538 References

539

- 540 1 Coyne, J.A. and Orr, H.A. (2004) *Speciation*, Sinauer Associates.
- 541 2 Mallet, J. *et al.* (2009) Space, sympatry and speciation. *J. Evol. Biol.* 22, 2332–41
- 542 3 Fitzpatrick, B.M. *et al.* (2009) Pattern, process and geographic modes of speciation. *J. Evol. Biol.*  
543 22, 2342–2347
- 544 4 Fitzpatrick, B.M. *et al.* (2008) What, if anything, is sympatric speciation? *J. Evol. Biol.* 21, 1452–  
545 1459
- 546 5 Bolnick, D.I. and Fitzpatrick, B.M. (2007) Sympatric Speciation: Models and Empirical Evidence.  
547 *Annu. Rev. Ecol. Evol. Syst.* 38, 459–487
- 548 6 Nosil, P. and Schluter, D. (2011) The genes underlying the process of speciation. *Trends Ecol.*  
549 *Evol.* 26, 160–167
- 550 7 Ravinet, M. *et al.* (2017) Interpreting the genomic landscape of speciation: a road map for finding  
551 barriers to gene flow. *J. Evol. Biol.* 30, 1450–1477
- 552 8 Felsenstein, J. (1981) Skepticism towards Santa Rosalia, or why are there so few kinds of animals?  
553 *Evolution (N. Y.)*. 35, 124–138
- 554 9 Dieckmann, U. and Doebeli, M. (1999) On the origin of species by sympatric speciation. *Nature*  
555 400, 354
- 556 10 Gavrillets, S. (2004) *Fitness landscape and origin of species*, Princeton University Press.
- 557 11 Doebeli, M. *et al.* (2005) What we have also learned: adaptive speciation is theoretically plausible.  
558 *Evolution (N. Y.)*. 59, 691–699
- 559 12 Matessi, C. *et al.* (2002) Long-term Buildup of Reproductive Isolation Promoted by Disruptive  
560 Selection: How Far Does it Go? *Selection* 2, 41–64
- 561 13 Bolnick, D.I. and Doebeli, M. (2003) Sexual dimorphism: two sides of the same ecological coin.  
562 *Evolution (N. Y.)*. 57, 2433–2449
- 563 14 Bolnick, D.I. (2006) Multi-species outcomes in a common model of sympatric speciation. *J.*  
564 *Theor. Biol.* 241, 734–744
- 565 15 Bürger, R. and Schneider, K.A. (2006) Intraspecific Competitive Divergence and Convergence  
566 under Assortative Mating. *Am. Nat.* 167, 190–205
- 567 16 Otto, S.P. *et al.* (2008) Frequency-dependent selection and the evolution of assortative mating.  
568 *Genetics* 179, 2091–2112
- 569 17 Kirkpatrick, M. and Ravigné, V. (2002) Speciation by Natural and Sexual Selection: Models and  
570 Experiments. *Am. Nat.* 159, S22–S35
- 571 18 Turelli, M. *et al.* (2001) Theory and speciation. *Trends Ecol. Evol.* 16, 330–343
- 572 19 Garner, A.G. *et al.* (2018) Genomic signatures of reinforcement. *Genes (Basel)*. 9,
- 573 20 van Doorn, G.S. and Weissing, F.J. (2002) Ecological versus Sexual Selection Models of  
574 Sympatric Speciation: A Synthesis. *Selection* 2, 17–40

- 575 21 Seehausen, O. (2004) Hybridization and adaptive radiation. *Trends Ecol. Evol.* 19, 198–207
- 576 22 Seehausen, O. (2013) Conditions when hybridization might predispose populations for adaptive  
577 radiation. *J. Evol. Biol.* 26, 279–281
- 578 23 Turissini, D.A. and Matute, D.R. (2017) Fine scale mapping of genomic introgressions within the  
579 *Drosophila yakuba* clade. *PLOS Genet.* 13, e1006971
- 580 24 Martin, C.H. (2012) Weak disruptive selection and incomplete phenotypic divergence in two  
581 classic examples of sympatric speciation: Cameroon crater lake cichlids. *Am. Nat.* 180, E90–E109
- 582 25 Meier, J.I. *et al.* (2017) Ancient hybridization fuels rapid cichlid fish adaptive radiations. *Nat.*  
583 *Commun.* 8, 1–11
- 584 26 Wagner, C.E. and McCune, A.R. (2009) Contrasting patterns of spatial genetic structure in  
585 sympatric rock-dwelling cichlid fishes. *Evolution (N. Y.)*. 63, 1312–1326
- 586 27 Servedio, M.R. and Boughman, J.W. (2017) The Role of Sexual Selection in Local Adaptation and  
587 Speciation. *Annu. Rev. Ecol. Evol. Syst.* 48, annurev-ecolsys-110316-022905
- 588 28 Kopp, M. *et al.* (2018) Mechanisms of Assortative Mating in Speciation with Gene Flow:  
589 Connecting Theory and Empirical Research. *Am. Nat.* 191, 1–20
- 590 29 Servedio, M.R. *et al.* (2011) Magic traits in speciation: ‘magic’ but not rare? *Trends Ecol. Evol.*  
591 26, 389–397
- 592 30 Turner, G.F. and Burrows, M.T. (1995) A model of sympatric speciation by sexual selection.  
593 *Proc. R. Soc. London. Ser. B Biol. Sci.* 260, 287–292
- 594 31 Weissing, F.J. *et al.* (2011) Adaptive speciation theory: A conceptual review. *Behav. Ecol.*  
595 *Sociobiol.* 65, 461–480
- 596 32 Kirkpatrick, M. and Barton, N.H. (2006) Chromosome inversions, local adaptation and speciation.  
597 *Genetics* 173, 419–434
- 598 33 Feder, J.L. and Nosil, P. (2009) Chromosomal inversions and species differences: When are genes  
599 affecting adaptive divergence and reproductive isolation expected to reside within inversions?  
600 *Evolution (N. Y.)*. 63, 3061–3075
- 601 34 Servedio, M. and Bürger, R. The Effects on Parapatric Divergence of Linkage between Preference  
602 and Trait Loci versus Pleiotropy. , *Genes* , 9. (2018)
- 603 35 Feder, J.L. *et al.* (2003) Allopatric genetic origins for sympatric host-plant shifts and race  
604 formation in *Rhagoletis*. *Proc. Natl. Acad. Sci.* 100, 10314–10319
- 605 36 Fuller, Z. *et al.* The role of chromosomal inversions in speciation. *biorxiv.org* at  
606 <<https://www.biorxiv.org/content/early/2017/11/24/211771.abstract>>
- 607 37 Kirkpatrick, M. *et al.* Chromosome inversions, local adaptation and speciation. *Genet. Soc Am.* at  
608 <<http://www.genetics.org/content/173/1/419.short>>
- 609 38 Martin, C.H. (2013) Strong assortative mating by diet, color, size, and morphology but limited  
610 progress toward sympatric speciation in a classic example: Cameroon crater lake cichlids.  
611 *Evolution (N. Y.)*. 67, 2114–23
- 612 39 Bolnick, D.I. (2011) Sympatric Speciation in Threespine Stickleback: Why Not? *Int. J. Ecol.*  
613 2011, 1–15
- 614 40 Gavrilets, S. *et al.* (2007) Case studies and mathematical models of ecological speciation. 1.  
615 Cichlids in a crater lake. *Mol. Ecol.* 16, 2893–909
- 616 41 Gavrilets, S. and Vose, A. (2007) Case studies and mathematical models of ecological speciation.  
617 2. Palms on an oceanic island. *Mol. Ecol.* 16, 2910–21
- 618 42 Gavrilets, S. (2014) Models of speciation: Where are we now? *J. Hered.* 105, 743–755
- 619 43 Schlieven, U.K. *et al.* (1994) Sympatric speciation suggested by monophyly of crater lake  
620 cichlids. *Nature* 368, 629–631
- 621 44 Schlieven, U.K. and Klee, B. (2004) Reticulate sympatric speciation in Cameroonian crater lake  
622 cichlids. *Front. Zool.* 1, 9–14
- 623 45 Barluenga, M. *et al.* (2006) Sympatric speciation in Nicaraguan crater lake cichlid fish. *Nature*  
624 439, 719–723
- 625 46 Hahn, M.W. and Nakhleh, L. (2015) Irrational exuberance for resolved species trees. *Evolution (N.*

- 626 Y). DOI: 10.1111/evo.12832
- 627 47 Wu, C.-I. (2001) The genic view of the process of speciation. *J. Evol. Biol.* 14, 851–865
- 628 48 McGirr, J.A. and Martin, C.H. (2016) Novel candidate genes underlying extreme trophic
- 629 specialization in Caribbean pupfishes. *Mol. Biol. Evol.* 34, 873–888
- 630 49 Martin, S.H. *et al.* (2013) Genome-wide evidence for speciation with gene flow in *Heliconius*
- 631 butterflies. *Genome Res.* 23, 1817–1828
- 632 50 Fontaine, M.C. *et al.* (2015) Extensive introgression in a malaria vector species complex revealed
- 633 by phylogenomics. *Science (80-. )*. 347, 1258522–1258522
- 634 51 Campbell, C.R. *et al.* (2018) What is Speciation Genomics? The roles of ecology, gene flow, and
- 635 genomic architecture in the formation of species. *Biol. J. Linn. Soc.*
- 636 52 Papadopolus *et al.* (2011) Speciation with gene flow on Lord Howe Island. *Proc. Natl. Acad. Sci.*
- 637 *U. S. A.* 108, 13188–93
- 638 53 Geiger, M.F. *et al.* (2013) Crater Lake Apoyo Revisited - Population Genetics of an Emerging
- 639 Species Flock. *PLoS One* 8, 1–17
- 640 54 Elmer, K.R. *et al.* (2014) Parallel evolution of Nicaraguan crater lake cichlid fishes via non-
- 641 parallel routes. *Nat. Commun.* 5, 1–8
- 642 55 Barluenga, M. and Meyer, A. (2010) Phylogeography, colonization and population history of the
- 643 Midas cichlid species complex (*Amphilophus* spp.) in the Nicaraguan crater lakes. *BMC Evol.*
- 644 *Biol.* 10, 326
- 645 56 Kusche, H. *et al.* (2015) Sympatric ecological divergence associated with a color polymorphism.
- 646 *BMC Biol.* 13,
- 647 57 Pfaender, J. *et al.* (2016) Rugged adaptive landscapes shape a complex, sympatric radiation. *Proc.*
- 648 *R. Soc. B Biol. Sci.* 283, 11–13
- 649 58 Hadid, Y. *et al.* (2013) Possible incipient sympatric ecological speciation in blind mole rats
- 650 (*Spalax*). *Proc. Natl. Acad. Sci.* 110, 2587–2592
- 651 59 Elmer, K.R. *et al.* (2010) Rapid evolution and selection inferred from the transcriptomes of
- 652 sympatric crater lake cichlid fishes. *Mol. Ecol.* 19, 197–211
- 653 60 Foote, A. *et al.* Genome-culture coevolution promotes rapid divergence of killer whale ecotypes.
- 654 *nature.com* at <<https://www.nature.com/articles/ncomms11693>>
- 655 61 Alcaide, M. *et al.* (2014) Genomic divergence in a ring species complex. *Nature* 511, 83–85
- 656 62 Igea, J. *et al.* (2015) A comparative analysis of island floras challenges taxonomy-based
- 657 biogeographical models of speciation. *Evolution (N. Y.)*. 69, 482–491
- 658 63 Malinsky, M. *et al.* (2015) Genomic islands of speciation separate Cichlid ectomorphs in an East
- 659 African crater lake. *Science (80-. )*. 350, 1493–1498
- 660 64 Martin, C.H. *et al.* (2015) Complex histories of repeated gene flow in Cameroon crater lake
- 661 cichlids cast doubt on one of the clearest examples of sympatric speciation. *Evolution (N. Y.)*. 69,
- 662 1406–1422
- 663 65 Kautt, A.F. *et al.* (2016) Multispecies Outcomes of Sympatric Speciation after Admixture with the
- 664 Source Population in Two Radiations of Nicaraguan Crater Lake Cichlids. *PLoS Genet.* 12, 1–33
- 665 66 Poelstra, J. *et al.* (2018) Speciation in sympatry with ongoing secondary gene flow and an
- 666 olfactory trigger in a radiation of Cameroon cichlids. *bioRxiv* 229864,
- 667 67 Richards, E. *et al.* (2018) Don't throw out the sympatric speciation with the crater lake water: fine-
- 668 scale investigation of introgression provides equivocal support for causal role of secondary gene
- 669 flow in one of the clearest examples of sympatric speciation. *bioRxiv*
- 670 68 Machado-Schiaffino, G. *et al.* (2015) Parallel evolution in Ugandan crater lakes: Repeated
- 671 evolution of limnetic body shapes in haplochromine cichlid fish. *BMC Evol. Biol.* 15,
- 672 69 Wu, C.-I. and Ting, C.-T. (2004) Genes and speciation. *Nat. Rev. Genet.* 5, 114–122
- 673 70 Foote, A.D. (2017) Sympatric Speciation in the Genomic Era. *Trends Ecol. Evol.* 33, 85–95
- 674 71 Martin, C.H. (2016) The cryptic origins of evolutionary novelty : 1000-fold faster trophic
- 675 diversification rates without increased ecological opportunity or hybrid swarm. DOI:
- 676 10.1111/evo.13046

- 677 72 Dasmahapatra, K.K. *et al.* (2012) Butterfly genome reveals promiscuous exchange of mimicry  
678 adaptations among species. *Nature* 487, 94–98
- 679 73 Hedrick, P.W. (2013) Adaptive introgression in animals: Examples and comparison to new  
680 mutation and standing variation as sources of adaptive variation. *Mol. Ecol.* 22, 4606–4618
- 681 74 Huerta-Sanchez, E. *et al.* (2014) Altitude adaptation in Tibetans caused by introgression of  
682 Denisovan-like DNA. *Nature* 512, 194–197
- 683 75 Stankowski, S. and Streisfeld, M.A. (2015) Introgressive hybridization facilitates adaptive  
684 divergence in a recent radiation of monkeyflowers. *Proc. R. Soc. B Biol. Sci.* 282,
- 685 76 Juan, E. *et al.* (2017) Evolution of novel mimicry rings facilitated by adaptive introgression in  
686 tropical butterflies. *Mol. Ecol.* 26, 5160–5172
- 687 77 Richards, E.J. and Martin, C.H. (2017) Adaptive introgression from distant Caribbean islands  
688 contributed to the diversification of a microendemic adaptive radiation of trophic specialist  
689 pupfishes. *PLOS Genet.* 13, e1006919
- 690 78 Rieseberg, L.H. *et al.* (1999) Transgressive segregation, adaptation and speciation. *Heredity*  
691 (*Edinb.*) 83, 363–372
- 692 79 Kagawa, K. and Takimoto, G. (2017) Hybridization can promote adaptive radiation by means of  
693 transgressive segregation. *Ecol. Lett.* 21, 264–274
- 694 80 Schumer, M. *et al.* (2014) How common is homoploid hybrid speciation? *Evolution (N. Y.)*. 68,  
695 1553–1560
- 696 81 Fishman, L. *et al.* (2013) Chromosomal rearrangements and the genetics of reproductive barriers  
697 in *mimulus* (monkey flowers). *Evolution (N. Y.)*. 67, 2547–2560
- 698 82 Guerrero, R.F. and Hahn, M.W. (2017) Speciation as a sieve for ancestral polymorphism. *Mol.*  
699 *Ecol.* DOI: 10.1111/mec.14290
- 700 83 Nelson, T.C. and Cresko, W.A. (2018) Ancient genomic variation underlies repeated ecological  
701 adaptation in young stickleback populations. *Evol. Lett.* 2, 9–21
- 702 84 Durand, E.Y. *et al.* (2011) Testing for ancient admixture between closely related populations. *Mol.*  
703 *Biol. Evol.* 28, 2239–2252
- 704 85 Smith, J.M. and Haigh, J. (1974) The hitch-hiking effect of a favourable gene. *Genet. Res.* 23, 23–  
705 35
- 706 86 Ravinet, M. *et al.* (2017) Interpreting the genomic landscape of speciation: a road map for finding  
707 barriers to gene flow. *J. Evol. Biol.* 30, 1450–1477
- 708 87 Nachman, M.W. and Payseur, B.A. (2012) Recombination rate variation and speciation :  
709 theoretical predictions and empirical results from rabbits and mice. DOI: 10.1098/rstb.2011.0249
- 710 88 Cruickshank, T.E. and Hahn, M.W. (2014) Reanalysis suggests that genomic islands of speciation  
711 are due to reduced diversity, not reduced gene flow. *Mol. Ecol.* 23, 3133–3157
- 712 89 Bay, R.A. and Rugg, K. (2017) Genomic islands of divergence or opportunities for introgression?  
713 *Proc. R. Soc. B Biol. Sci.* 284,
- 714 90 Clarkson, C.S. *et al.* (2014) Adaptive introgression between *Anopheles* sibling species eliminates  
715 a major genomic island but not reproductive isolation. *Nat. Commun.* 5, 4248
- 716 91 Stölting, K.N. *et al.* (2015) Genome-wide patterns of differentiation and spatially varying selection  
717 between postglacial recolonization lineages of *Populus alba* (Salicaceae), a widespread forest tree.  
718 *New Phytol.* 207, 723–734
- 719 92 Felsenstein, J. (1981) Skepticism towards Santa-Rosalía or why are there so few kinds of animals.  
720 *Evolution (N. Y.)*. 35, 124–138
- 721 93 Ortíz-Barrientos, D. and Noor, M.A.F. (2005) Evidence for a one-allele assortative mating locus.  
722 *Science* 310, 1467
- 723 94 Schrider, D.R. and Kern, A.D. (2016) S/HIC: Robust Identification of Soft and Hard Sweeps  
724 Using Machine Learning. *PLOS Genet.* 12, e1005928
- 725 95 Kern, A.D. and Schrider, D.R. (2018) diploS/HIC: An Updated Approach to Classifying Selective  
726 Sweeps. *G3 Genes|Genomes|Genetics*
- 727 96 Boyle, E.A. *et al.* (2017) An Expanded View of Complex Traits: From Polygenic to Omnigenic.

- 728 *Cell* 169, 1177–1186
- 729 97 Siepel, A. *et al.* (2005) Evolutionarily conserved elements in vertebrate, insect, worm, and yeast  
730 genomes. *Genome Res.* 15, 1034–1050
- 731 98 Erickson, P.A. *et al.* (2016) Microinjection for transgenesis and genome editing in threespine  
732 sticklebacks. *J. Vis. Exp.* DOI: 10.3791/54055
- 733 99 Kratochwil, C.F. *et al.* (2017) Tol2 transposon-mediated transgenesis in the Midas cichlid  
734 (*Amphilophus citrinellus*) — towards understanding gene function and regulatory evolution in an  
735 ecological model system for rapid phenotypic diversification. *BMC Dev. Biol.* 17, 15
- 736 100 Hart, J.C. and Miller, C.T. (2017) Sequence-Based Mapping and Genome Editing Reveal  
737 Mutations in Stickleback & Hps5; Cause Oculocutaneous Albinism and the  
738 & casper; Phenotype. *G3 Genes|Genomes|Genetics* 7, 3123 LP-3131
- 739 101 Cleves, P.A. *et al.* (2018) An intronic enhancer of *Bmp6* underlies evolved tooth gain in  
740 sticklebacks. *PLOS Genet.* 14, e1007449
- 741 102 Kronforst, M.R. *et al.* (2013) Hybridization Reveals the Evolving Genomic Architecture of  
742 Speciation. *Cell Rep.* 5, 666–677
- 743 103 Renaut, S. *et al.* (2013) Genomic islands of divergence are not affected by geography of speciation  
744 in sunflowers. *Nat. Commun.* 4, 1–8
- 745 104 Burri, R. *et al.* (2015) Linked selection and recombination rate variation drive the evolution of the  
746 genomic landscape of differentiation across the speciation continuum of *Ficedula* flycatchers.  
747 *Genome Res.* 25, 1656–1665
- 748 105 Irwin, D.E. *et al.* (2016) Recurrent selection explains parallel evolution of genomic regions of high  
749 relative but low absolute differentiation in a ring species. *Mol. Ecol.* 25, 4488–4507
- 750 106 Burri, R. (2017) Interpreting differentiation landscapes in the light of long-term linked selection.  
751 *Evol. Lett.* 1, 118–131
- 752 107 Vijay, N. *et al.* (2017) Genomewide patterns of variation in genetic diversity are shared among  
753 populations, species and higher-order taxa. *Mol. Ecol.* 26, 4284–4295
- 754 108 Van Doren, B.M. *et al.* (2017) Correlated patterns of genetic diversity and differentiation across an  
755 avian family. *Mol. Ecol.* 26, 3982–3997
- 756 109 Ma, T. *et al.* (2018) Ancient polymorphisms and divergence hitchhiking contribute to genomic  
757 islands of divergence within a poplar species complex. *Proc. Natl. Acad. Sci.* 115, E236 LP-E243
- 758 110 Delmore, K.E. *et al.* (2018) Comparative analysis examining patterns of genomic differentiation  
759 across multiple episodes of population divergence in birds. *Evol. Lett.* 2, 76–87
- 760 111 Bush, G.L. (1975) Modes of Animal Speciation. *Annu. Rev. Ecol. Syst.* 6, 339–364
- 761 112 Sorenson, M.D. *et al.* (2003) Speciation by host switch in brood parasitic indigobirds. 424, 31–32
- 762 113 Savolainen, V. *et al.* (2006) Sympatric speciation in palms on an oceanic island. *Nature* 441, 210–  
763 213
- 764 114 Kondrashov, A.S. and Kondrashov, F.A. (1999) Interactions among quantitative traits in the  
765 course of sympatric speciation. *Nature* 400, 351–354
- 766 115 Martin, C.H. and Turner, B.J. (2018) Long-distance dispersal over land by fishes: extremely rare  
767 ecological events become probable over millennial timescales. *Proc. R. Soc. B Biol. Sci.* 285,
- 768 116 Martin, C.H. *et al.* (2016) Diabolical survival in Death Valley: recent pupfish colonization, gene  
769 flow, and genetic assimilation in the smallest species range on earth. *Proc. R. Soc. B Biol. Sci.* 283,  
770 23–34
- 771 117 A., C.J. and Allen, O.H. (1989) Patterns of speciation in *Drosophila*. *Evolution (N. Y.)*. 43, 362–  
772 381
- 773 118 Polechová, J. *et al.* (2005) SPECIATION THROUGH COMPETITION: A CRITICAL REVIEW.  
774 *Evolution (N. Y.)*. 59, 1194–1210
- 775 119 Norvaišas, P. and Kisdi, E. (2012) Revisiting Santa Rosalia to Unfold a Degeneracy of Classic  
776 Models of Speciation. *Am. Nat.* 180, 388–393
- 777 120 Kopp, M. and Hermisson, J. (2008) Competitive speciation and costs of choosiness. *J. Evol. Biol.*  
778 21, 1005–1023

- 779 121 Yeaman, S. and Whitlock, M.C. (2011) The genetic architecture of adaptation under migration-  
780 selection balance. *Evolution (N. Y.)*. 65, 1897–1911
- 781 122 Bürger, R. and Akerman, A. (2011) The effects of linkage and gene flow on local adaptation: A  
782 two-locus continent–island model. *Theor. Popul. Biol.* 80, 272–288
- 783 123 Akerman, A. and Bürger, R. (2014) The consequences of gene flow for local adaptation and  
784 differentiation: a two-locus two-deme model. *J. Math. Biol.* 68, 1135–1198
- 785 124 Yeaman, S. *et al.* (2016) The evolution of genomic islands by increased establishment probability  
786 of linked alleles. *Mol. Ecol.* 25, 2542–2558
- 787 125 Cotto, O. and Servedio, M.R. (2017) The Roles of Sexual and Viability Selection in the Evolution  
788 of Incomplete Reproductive Isolation: From Allopatry to Sympatry. *Am. Nat.* 190, 680–693
- 789 126 Sachdeva, H. and Barton, N.H. (2017) Divergence and evolution of assortative mating in a  
790 polygenic trait model of speciation with gene flow. *Evolution (N. Y.)*. 71, 1478–1493
- 791 127 Seehausen, O. (2006) African cichlid fish: A model system in adaptive radiation research. *Proc. R.*  
792 *Soc. B Biol. Sci.* 273, 1987–1998
- 793 128 Sparks, J.S. (2004) Molecular phylogeny and biogeography of the Malagasy and South Asian  
794 cichlids (Teleostei: Perciformes: Cichlidae). *Mol. Phylogenet. Evol.* 30, 599–614
- 795 129 Martin, C.H. and Wainwright, P.C. (2013) A Remarkable Species Flock of Cyprinodon Pupfishes  
796 Endemic to San Salvador Island, Bahamas. *Bull. Peabody Museum Nat. Hist.* 54, 231–241
- 797 130 Ford, A.G.P. *et al.* (2015) High levels of interspecific gene flow in an endemic cichlid fish  
798 adaptive radiation from an extreme lake environment. *Mol. Ecol.* 24, 3421–3440
- 799 131 Herder, F. *et al.* (2008) Adaptive sympatric speciation of polychromatic “roundfin” sailfin  
800 silverside fish in Lake Matano (Sulawesi). *Evolution (N. Y.)*. 62, 2178–2195
- 801 132 Sibbing, F.A. *et al.* (1998) Speciation of endemic Lake Tana barbs (Cyprinidae, Ethiopia) driven  
802 by trophic resource partitioning; a molecular and ecomorphological approach. *Aquat. Ecol.* 32,  
803 217–227
- 804 133 Elmer, K.R. *et al.* (2010) Rapid sympatric ecological differentiation of crater lake cichlid fishes  
805 within historic times. *BMC Biol.* 8,
- 806 134 Kautt, A.F. *et al.* (2018) Lessons from a natural experiment : Allopatric morphological divergence  
807 and sympatric diversification in the Midas cichlid species complex are largely influenced by  
808 ecology in a deterministic way. *Evol. Lett.* DOI: 10.1002/evl3.64
- 809 135 Wagner, C.E. *et al.* (2014) Cichlid species-area relationships are shaped by adaptive radiations that  
810 scale with area. *Ecol. Lett.* 17, 583–592
- 811 136 Kautt, A.F. *et al.* (2016) Incipient sympatric speciation in Midas cichlid fish from the youngest  
812 and one of the smallest crater lakes in Nicaragua due to differential use of the benthic and limnetic  
813 habitats? *Ecol. Evol.* 6, 5342–5357
- 814 137 Kratochwil, C.F. *et al.* (2015) Embryonic and larval development in the Midas cichlid fish species  
815 flock (*Amphilophus* spp.): A new evo-devo model for the investigation of adaptive novelties and  
816 species differences Evolutionary developmental biology. *BMC Dev. Biol.* 15, 1–15
- 817 138 Martin, S.H. *et al.* (2015) Evaluating the use of ABBA-BABA statistics to locate introgressed loci.  
818 *Mol. Biol. Evol.* 32, 244–257
- 819 139 Rosenzweig, B.K. *et al.* (2016) Powerful methods for detecting introgressed regions from  
820 population genomic data. *Mol. Ecol.* 25, 2387–2397
- 821 140 Schrider, D.R. *et al.* (2018) Supervised machine learning reveals introgressed loci in the genomes  
822 of *Drosophila simulans* and *D. sechellia*. *PLOS Genet.* 14, e1007341
- 823 141 Hibbins, M.S. and Hahn, M.W. (2018) Population genetic tests for the direction and relative  
824 timing of introgression. *bioRxiv*
- 825 142 Elworth, R. *et al.* (2018) DGEN: A Test Statistic for Detection of General Introgression Scenarios.  
826 *bioRxiv*
- 827 143 Excoffier, L. *et al.* (2013) Robust Demographic Inference from Genomic and SNP Data. *PLoS*  
828 *Genet.* 9,
- 829 144 Gutenkunst, R.N. *et al.* (2009) Inferring the Joint Demographic History of Multiple Populations

- 830 from Multidimensional SNP Frequency Data. *PLOS Genet.* 5, e1000695  
831 145 Pool, J.E. and Nielsen, R. (2009) Inference of Historical Changes in Migration Rate From the  
832 Lengths of Migrant Tracts. *Genetics* 181, 711 LP-719  
833 146 Gravel, S. (2012) Population Genetics Models of Local Ancestry. *Genetics* 191, 607 LP-619  
834 147 Loh, P.-R. *et al.* (2013) Inferring Admixture Histories of Human Populations Using Linkage  
835 Disequilibrium. *Genetics* 193, 1233 LP-1254  
836 148 Vernot, B. and Akey, J.M. (2014) Resurrecting Surviving Neandertal Lineages from Modern  
837 Human Genomes. *Science* (80-. ).  
838 149 Gronau, I. *et al.* (2011) Bayesian inference of ancient human demography from individual genome  
839 sequences. *Nat. Genet.* 43, 1031  
840 150 Patterson, N. *et al.* (2014) The genomic landscape of Neanderthal ancestry in present-day humans.  
841 *Nature* 507, 354–7  
842 151 Prüfer, K. *et al.* (2013) The complete genome sequence of a Neanderthal from the Altai  
843 Mountains. *Nature* 505, 43  
844 152 Seguin-Orlando, A. *et al.* (2014) Genomic structure in Europeans dating back at least 36,200  
845 years. *Science* (80-. ). 346, 1113 LP-1118  
846 153 Thomson, R. *et al.* (2000) Recent common ancestry of human Y chromosomes: Evidence from  
847 DNA sequence data. *Proc. Natl. Acad. Sci.* 97, 7360 LP-7365  
848 154 Tang, H. *et al.* (2002) Frequentist Estimation of Coalescence Times From Nucleotide Sequence  
849 Data Using a Tree-Based Partition. *Genetics* 161, 447 LP-459  
850 155 Hudson, R.R. (2007) The Variance of Coalescent Time Estimates from DNA Sequences. *J. Mol.*  
851 *Evol.* 64, 702–705  
852 156 Coop, G. *et al.* (2008) The Timing of Selection at the Human FOXP2 Gene. *Mol. Biol. Evol.* 25,  
853 1257–1259  
854 157 Peter, B.M. *et al.* (2012) Distinguishing between Selective Sweeps from Standing Variation and  
855 from a De Novo Mutation. *PLOS Genet.* 8, e1003011  
856 158 Beleza, S. *et al.* (2013) The Timing of Pigmentation Lightening in Europeans. *Mol. Biol. Evol.* 30,  
857 24–35  
858 159 Nakagome, S. *et al.* (2016) Estimating the Ages of Selection Signals from Different Epochs in  
859 Human History. *Mol. Biol. Evol.* 33, 657–669  
860 160 Ormond, L. *et al.* (2016) Inferring the age of a fixed beneficial allele. *Mol. Ecol.* 25, 157–169  
861 161 Chen, H. and Slatkin, M. (2013) Inferring Selection Intensity and Allele Age from Multilocus  
862 Haplotype Structure. *G3 Genes, Genomes, Genetics* 3, 1429–1442  
863 162 Chen, H. *et al.* (2015) A hidden Markov model for investigating recent positive selection through  
864 haplotype structure. *Theor. Popul. Biol.* 99, 18–30  
865 163 Smith, J. *et al.* (2018) Estimating time to the common ancestor for a beneficial allele. *Mol. Biol.*  
866 *Evol.* 35, 1003–1017  
867 164 Ekblom, R. and Wolf, J.B.W. (2014) A field guide to whole-genome sequencing, assembly and  
868 annotation. *Evol. Appl.* 7, 1026–1042  
869 165 Matz, M. V (2018) Fantastic Beasts and How To Sequence Them: Ecological Genomics for  
870 Obscure Model Organisms. *Trends Genet.* 34, 121–132  
871 166 Chatterjee, S. and Ahituv, N. (2017) Gene Regulatory Elements, Major Drivers of Human Disease.  
872 *Annu. Rev. Genomics Hum. Genet.* 18, 45–63  
873 167 Witte, J.S. (2010) Genome-Wide Association Studies and Beyond. *Annu. Rev. Public Health* 31,  
874 9–20  
875 168 Price, A.L. *et al.* (2015) Progress and promise in understanding the genetic basis of common  
876 diseases. *Proc. R. Soc. B Biol. Sci.* 282, 20151684  
877 169 Gibson, G. (2018) Population genetics and GWAS: A primer. *PLoS Biol.* 16, 1–6  
878 170 Hart, J.C. and Miller, C.T. (2017) Sequence-based mapping and genome editing reveal mutations  
879 in stickleback *Hps5* cause oculocutaneous albinism and the Casper phenotype. *G3*  
880 *Genes|Genomes|Genetics* 7, 3123 LP-3131
